# Supplementary material
Source: PubMed Central journal article supplement (PMC5282948)

## Supplemental Tables and Figures

“Peroxisome Proliferator-Activated Receptor- $\alpha$  Accelerates  $\alpha$ -Chlorofatty Acid

Catabolism”

### Supplemental Table S1. Primer sequences

| Gene                      | Forward                          | Reverse                          | Genebank ID or (Ref) |
|---------------------------|----------------------------------|----------------------------------|----------------------|
| <b>mGAPDH</b>             | ACC CAG AAG ACT GTG<br>GAT GG    | CAC ATT GGG GGT<br>AGG AAC AC    | NM_001289726.1       |
| <b>mCD36</b>              | AGC AAC TGG TGG ATG<br>GTT TC    | GCA GAA TCA<br>AGG GAG AGC AC    | NM_001159558.1       |
| <b>mCROT</b>              | TAC TTT TAC CAC GGC<br>CGA AC    | GAC GGT CAA ATC<br>CTT TTC CA    | NM_023733.3          |
| <b>mCPT1a</b>             | AAA CCC ACC AGG CTA<br>CAG TG    | TCC TTG TAA TGT<br>GCG AGC TG    | NM_013495.2          |
| <b>mCIDEC/<br/>Fsp27b</b> | GTG ACC ACA GCT TGG<br>GTC GGA   | GGG TCT CCC GGC<br>TGG GCT TA    | (1)                  |
| <b>CYP4a10</b>            | AGC CAC AAG GGC AGT<br>GTT CAG G | CCA AGC GGC CAT<br>TGG AAG AAA G | NM_010011.3          |

1. Langhi, C., and A. Baldan. 2015. Cidec/fsp27 is regulated by peroxisome proliferator-activated receptor alpha and plays a critical role in fasting- and diet-induced hepatosteatosis. *Hepatology* 61, 1227-1238

**Supplemental Table S2. Selected reaction monitoring parameters for a-CIDCA targets subjected to LC/MS.**

| <b>Target</b>                  | <b>SRM (<i>m/z</i>)</b> |
|--------------------------------|-------------------------|
| ([ <i>d</i> <sub>4</sub> ]-AdA | 149.15 → 105.19         |
| C6 (2-ClAdA)                   | 179.05 → 143.05         |
| C8                             | 207.08 → 171.08         |
| C10                            | 235.11 → 199.11         |
| C12                            | 263.14 → 227.14         |
| C14                            | 291.17 → 255.17         |
| C16                            | 319.2 → 283.2           |

Abbreviations include: AdA, adipic acid; a-CIDCA, a -Cl-dicarboxylic acid; C<sub>x</sub> refers to number of carbons.

**Supplemental Figure S1.** White blood cell (A) and neutrophil (B) counts in blood of PPAR<sup>-/-</sup> and C57BL/6J mice. Mice were euthanized and blood was gently removed by cardiac puncture and gently mixed in tubes containing 10 mM EDTA. White blood cell differentials were then determined within 4 h of blood collection using a Cell-Dyn 3700 analyzer.

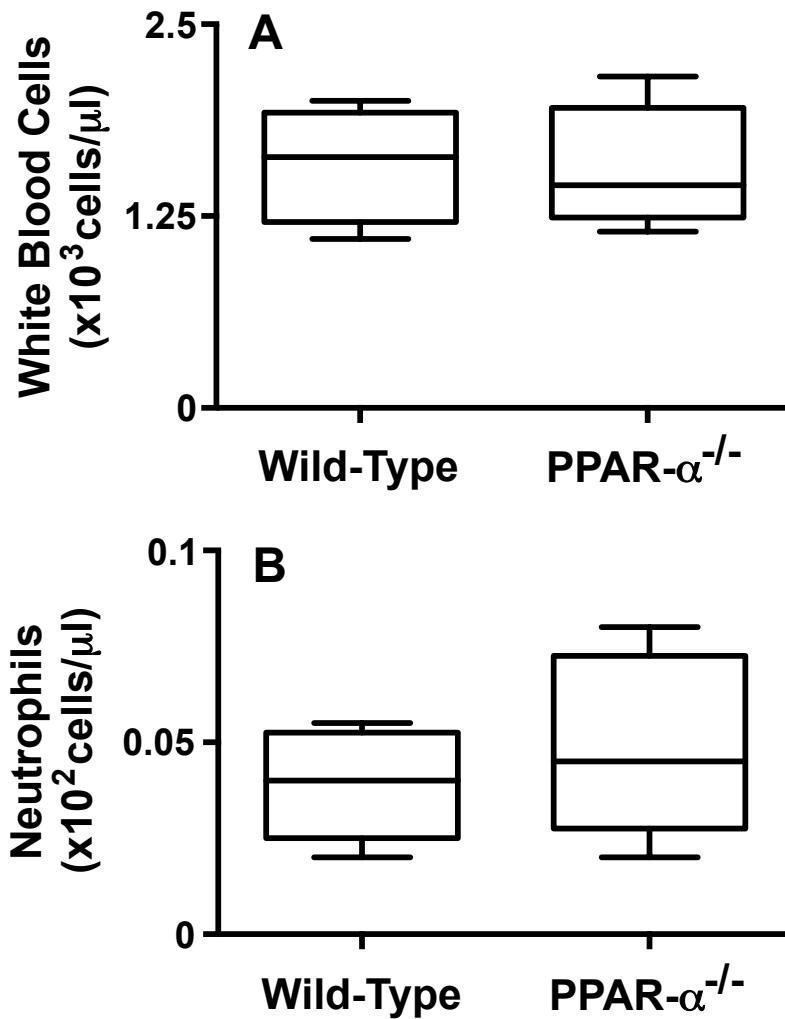

Supplement: 10.1194_M069740_jlr.M069740-1.pdf [file 10.1194_M069740_jlr.M069740-1.pdf]
